# Supplementary material for: Rapid and visual readout of vitamin B1 based on the electrostatic interaction induced aggregation of gold nanoparticles
Source: Royal Society of Chemistry journal article supplement (doi:10.1039/c8ra08153k), 2018-01-01
Supplement: c8ra08153k1.pdf [file c8ra08153k1.pdf]

## Supporting Information

### Rapid and visual readout of Vitamin B1 based on the electrostatic interaction induced aggregation of gold nanoparticles

Liping Lin<sup>a\*</sup>, Jiajing Wang<sup>a</sup>, Wei Liu<sup>b</sup>, Yaxin Luo<sup>a</sup>, Yanling Xiao<sup>a</sup> and Yuhan Wang<sup>a</sup>

<sup>a</sup>Department of Applied Chemistry, College of Life Sciences, Fujian Agriculture and Forestry University, Fuzhou, 350002, China

<sup>b</sup>Department of Bioinformatics, College of Life Sciences, Fujian Agriculture and Forestry University, Fuzhou, 350002, China

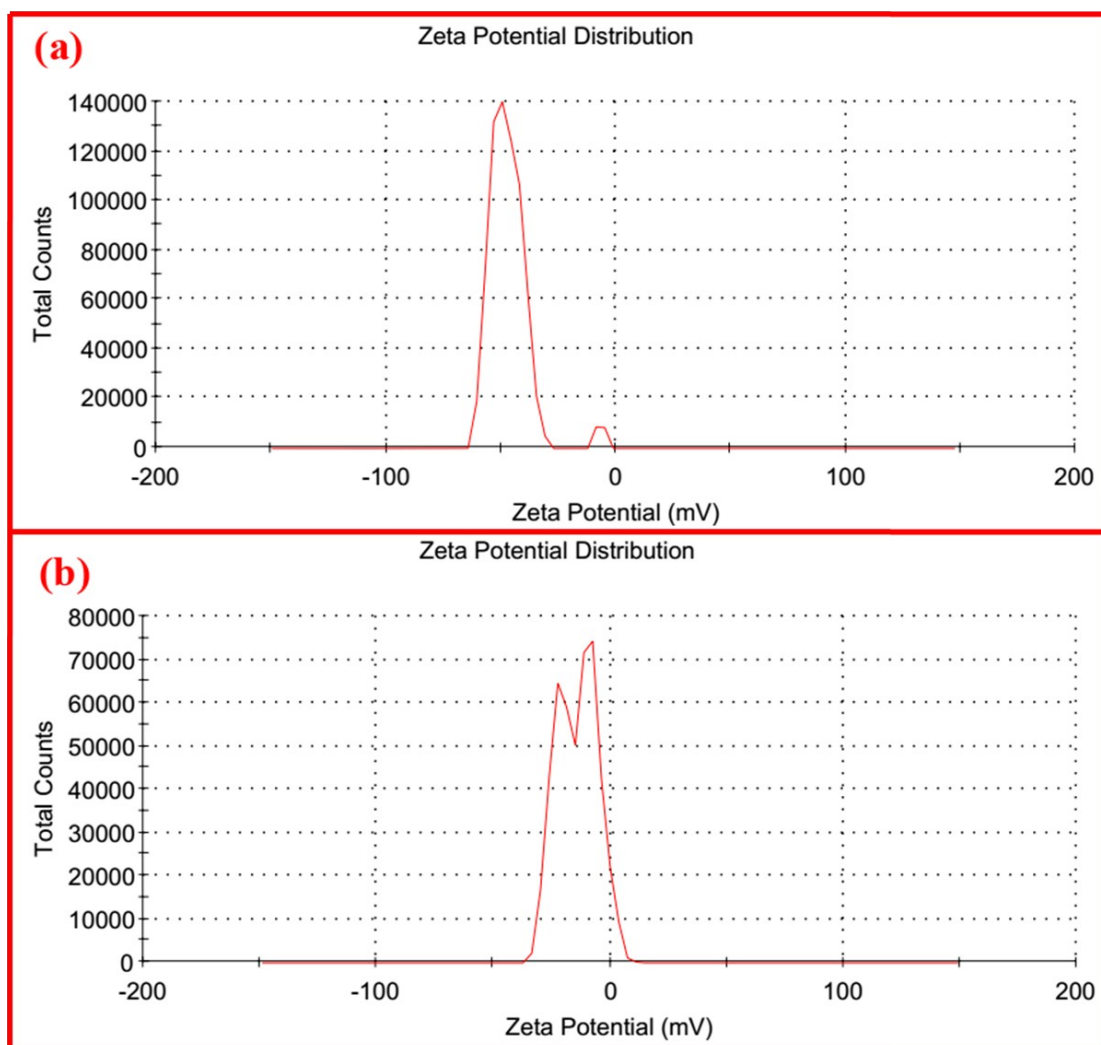

**Fig. 1** Zeta potential results of AuNPs in the absence (a) and in the presence (b) of 300 nM VB1

\* Corresponding author: Liping Lin, E-mail: linliping2015@fafu.edu.cn

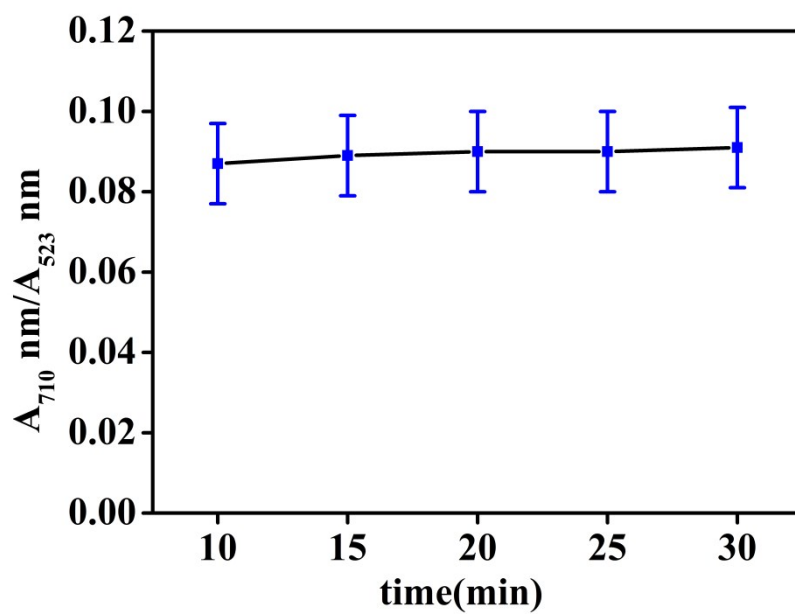

Fig. 2 Stability study of AuNPs-VB1 system

**Table 1** Comparison of different methods for the detection of VB1.

| Method                                               | Linear range (nM)                     | Detection limit (nM) | References     |
|------------------------------------------------------|---------------------------------------|----------------------|----------------|
| AuNPs                                                | 30-650                                | 10.9                 | Present method |
| Glutathione-AgNPs                                    | $4.0 \times 10^3$ - $1.2 \times 10^4$ | 50.0                 | 1              |
| Glutathione-Cu nanoclusters                          | 20.0-100                              | 4.6                  | 2              |
| Arginine-functionalized graphene quantum dots        | $1.0 \times 10^2$ - $8.0 \times 10^3$ | 53                   | 3              |
| Carbon dots                                          | $1.0 \times 10^4$ - $5.0 \times 10^4$ | 280                  | 4              |
| Eu-doped Y <sub>2</sub> O <sub>3</sub> nanoparticles | 0- $4.4 \times 10^4$                  | 144                  | 5              |

**References**

- 1 R. Rajamanikandan and M. Ilanchelian, *Sensor. Actuat. B: Chem.*, 2017, **244**, 380-386.
- 2 Y. Luo, H. Miao and X. Yang, *Talanta*, 2015, **144**, 488-495.
- 3 F. Nemati, R. Zare-Dorabei, M. Hosseini and M.R. Ganjali, *Sensor. Actuat. B: Chem.*, 2017, **255**, 2078-2085.
- 4 R. Purbia and S. Paria, *Biosens. Bioelectron.*, 2016, **79**, 467-475.
- 5 A. Bayandori Moghadam, F. Gudarzy and Y. Ganjkhanelou, *J. Fluoresc.*, 2014, **24**, 1025-1030.
